# Supplementary material for: Lactase Persistence, Milk Intake, and Adult Acne: A Mendelian Randomization Study of 20,416 Danish Adults
Source: PubMed Central journal article supplement (PMC6115808; doi:10.3390/nu10081041), 2018-08-08
Supplement: nutrients-10-01041-s001.pdf [file nutrients-10-01041-s001.pdf]

**Supplementary data**

**Supplementary Table 1:** Hardy-Weinberg equilibrium test

| <b>LCT-13910 C/T genotypes</b> | <b>Number observed</b> | <b>Number expected</b> | <b>Hardy Weinberg disequilibrium coefficient</b> | <b>x<sup>2</sup></b> | <b>p-value</b> |
|--------------------------------|------------------------|------------------------|--------------------------------------------------|----------------------|----------------|
| <b>Age 20-39</b>               |                        |                        |                                                  |                      |                |
| CC                             | 166                    | 151                    | 0.0055                                           | 2.54                 | 0.11           |
| TC                             | 955                    | 985                    |                                                  |                      |                |
| TT                             | 1621                   | 1606                   |                                                  |                      |                |
| <b>Age group ≥40 years</b>     |                        |                        |                                                  |                      |                |
| CC                             | 1080                   | 1042                   | 0.0022                                           | 2.44                 | 0.12           |
| TC                             | 6422                   | 6498                   |                                                  |                      |                |
| TT                             | 10172                  | 10134                  |                                                  |                      |                |

**Supplementary Table 2:** Characteristics by age groups.

|                                             | <b>Age groups:</b>      |                          |                          |                          |                          |                          |                         |                        |
|---------------------------------------------|-------------------------|--------------------------|--------------------------|--------------------------|--------------------------|--------------------------|-------------------------|------------------------|
|                                             | <b>20-29</b><br>(n=293) | <b>30-39</b><br>(n=2450) | <b>40-49</b><br>(n=4324) | <b>50-59</b><br>(n=4618) | <b>60-69</b><br>(n=5382) | <b>70-79</b><br>(n=2642) | <b>80-89</b><br>(n=678) | <b>90-99</b><br>(n=36) |
| Male, <i>N</i> (%)                          | 129 (44.18)             | 1064 (43.23)             | 1886 (43.62)             | 2057 (44.54)             | 2553 (47.44)             | 1258 (47.62)             | 331 (49.26)             | 16 (44.44)             |
| Acne, [2+3] <i>N</i> (%)                    | 24 (8.22)               | 117 (4.78)               | 83 (1.92)                | 40 (0.87)                | 20 (0.37)                | 14 (0.53)                | 5 (0.74)                | 0 (0.00)               |
| Any milk intake, <i>N</i> (%)               | 259 (88.70)             | 2189 (89.35)             | 3573 (82.63)             | 3304 (71.55)             | 3618 (67.22)             | 1772 (67.07)             | 480 (71.43)             | 26 (72.22)             |
| Current smoker, <i>N</i> (%)                | 69 (23.63)              | 421 (17.18)              | 822 (19.01)              | 931 (20.16)              | 967 (17.97)              | 356 (13.47)              | 64 (9.52)               | 2 (5.56)               |
| BMI, <i>mean</i> ( <i>SD</i> )              | 25.47 (4.91)            | 25.96 (4.87)             | 26.46 (4.74)             | 26.84 (4.66)             | 27.11 (4.64)             | 27.17 (4.56)             | 26.23 (4.11)            | 25.38 (3.73)           |
| <b>“Pimples the last week?” <i>N</i>(%)</b> |                         |                          |                          |                          |                          |                          |                         |                        |
| Did not answer                              | 2 (0.68)                | 25 (1.02)                | 51 (1.18)                | 132 (2.86)               | 228 (4.24)               | 184 (6.96)               | 82 (12.20)              | 3 (8.33)               |
| [0] No                                      | 87 (29.76)              | 1274 (52.00)             | 3038 (70.26)             | 3849 (83.35)             | 4874 (90.56)             | 2372 (89.78)             | 568 (84.52)             | 33 (91.67)             |
| [1] Yes, a little                           | 179 (61.30)             | 1034 (42.20)             | 1152 (26.64)             | 597 (12.93)              | 260 (4.83)               | 72 (2.73)                | 17 (2.53)               | 0 (0.00)               |
| [2] Yes, quite a lot                        | 20 (6.85)               | 97 (3.96)                | 66 (1.53)                | 33 (0.71)                | 15 (0.28)                | 9 (0.34)                 | 4 (0.60)                | 0 (0.00)               |
| [3] Yes, very much                          | 4 (1.37)                | 20 (0.82)                | 17(0.39)                 | 7 (0.15)                 | 5 (0.09)                 | 5 (0.19)                 | 1 (0.15)                | 0 (0.00)               |
